# Supplementary material
Source: ML conference proceedings conference paper supplement (https://proceedings.mlr.press/v48/hazana16.html)
Supplement: Supplementary file 1 [file hazana16-supp.pdf]

## Supplementary material for “Variance-Reduced and Projection-Free Stochastic Optimization”

### A. Proof of Property (1)

*Proof.* We drop the subscript  $i$  for conciseness. Define  $g(\mathbf{w}) = f(\mathbf{w}) - \nabla f(\mathbf{v})^\top \mathbf{w}$ , which is clearly also convex and  $L$ -smooth on  $\Omega$ . Since  $\nabla g(\mathbf{v}) = \mathbf{0}$ ,  $\mathbf{v}$  is one of the minimizers of  $g(\mathbf{w})$ . Therefore we have

$$\begin{aligned} g(\mathbf{v}) - g(\mathbf{w}) &\leq g(\mathbf{w} - \frac{1}{L}\nabla g(\mathbf{w})) - g(\mathbf{w}) \\ &\leq \nabla g(\mathbf{w})^\top (\mathbf{w} - \frac{1}{L}\nabla g(\mathbf{w}) - \mathbf{w}) + \frac{L}{2}\|\mathbf{w} - \frac{1}{L}\nabla g(\mathbf{w}) - \mathbf{w}\|^2 && \text{(by smoothness of } g) \\ &= -\frac{1}{2L}\|\nabla g(\mathbf{w})\|^2 = -\frac{1}{2L}\|\nabla f(\mathbf{w}) - \nabla f(\mathbf{v})\|^2 \end{aligned}$$

Rearranging and plugging in the definition of  $g$  concludes the proof.  $\square$

### B. Analysis for SFW

The concrete update of SFW is

$$\begin{aligned} \mathbf{v}_k &= \operatorname{argmin}_{\mathbf{v} \in \Omega} \tilde{\nabla}_k^\top \mathbf{v} \\ \mathbf{w}_k &= (1 - \gamma_k)\mathbf{w}_{k-1} + \gamma_k \mathbf{v}_k \end{aligned}$$

where  $\tilde{\nabla}_k$  is the average of  $m_k$  iid samples of stochastic gradient  $\nabla f_i(\mathbf{w}_{k-1})$ . The convergence rate of SFW is presented below.

**Theorem 3.** *If each  $f_i$  is  $G$ -Lipschitz, then with  $\gamma_k = \frac{2}{k+1}$  and  $m_k = \left(\frac{G(k+1)}{LD}\right)^2$ , SFW ensures for any  $k$ ,*

$$\mathbb{E}[f(\mathbf{w}_k) - f(\mathbf{w}^*)] \leq \frac{4LD^2}{k+2}.$$

*Proof.* Similar to the proof of Lemma 2, we first proceed as follows,

$$\begin{aligned} f(\mathbf{w}_k) &\leq f(\mathbf{w}_{k-1}) + \nabla f(\mathbf{w}_{k-1})^\top (\mathbf{w}_k - \mathbf{w}_{k-1}) + \frac{L}{2}\|\mathbf{w}_k - \mathbf{w}_{k-1}\|^2 && \text{(smoothness)} \\ &= f(\mathbf{w}_{k-1}) + \gamma_k \nabla f(\mathbf{w}_{k-1})^\top (\mathbf{v}_k - \mathbf{w}_{k-1}) + \frac{L\gamma_k^2}{2}\|\mathbf{v}_k - \mathbf{w}_{k-1}\|^2 && (\mathbf{w}_k - \mathbf{w}_{k-1} = \gamma_k(\mathbf{v}_k - \mathbf{w}_{k-1})) \\ &\leq f(\mathbf{w}_{k-1}) + \gamma_k \tilde{\nabla}_k^\top (\mathbf{v}_k - \mathbf{w}_{k-1}) + \gamma_k (\nabla f(\mathbf{w}_{k-1}) - \tilde{\nabla}_k)^\top (\mathbf{v}_k - \mathbf{w}_{k-1}) + \frac{LD^2\gamma_k^2}{2} && (\|\mathbf{v}_k - \mathbf{w}_{k-1}\| \leq D) \\ &\leq f(\mathbf{w}_{k-1}) + \gamma_k \tilde{\nabla}_k^\top (\mathbf{w}^* - \mathbf{w}_{k-1}) + \gamma_k (\nabla f(\mathbf{w}_{k-1}) - \tilde{\nabla}_k)^\top (\mathbf{v}_k - \mathbf{w}_{k-1}) + \frac{LD^2\gamma_k^2}{2} && \text{(by optimality of } \mathbf{v}_k) \\ &= f(\mathbf{w}_{k-1}) + \gamma_k \nabla f(\mathbf{w}_{k-1})^\top (\mathbf{w}^* - \mathbf{w}_{k-1}) + \gamma_k (\nabla f(\mathbf{w}_{k-1}) - \tilde{\nabla}_k)^\top (\mathbf{v}_k - \mathbf{w}^*) + \frac{LD^2\gamma_k^2}{2} \\ &\leq f(\mathbf{w}_{k-1}) + \gamma_k (f(\mathbf{w}^*) - f(\mathbf{w}_{k-1})) + \gamma_k D \|\tilde{\nabla}_k - \nabla f(\mathbf{w}_{k-1})\| + \frac{LD^2\gamma_k^2}{2}, \end{aligned}$$

where the last step is by convexity and Cauchy-Schwarz inequality. Since  $f_i$  is  $G$ -Lipschitz, with Jensen's inequality, we further have  $\mathbb{E}[\|\tilde{\nabla}_k - \nabla f(\mathbf{w}_{k-1})\|] \leq \sqrt{\mathbb{E}[\|\tilde{\nabla}_k - \nabla f(\mathbf{w}_{k-1})\|^2]} \leq \frac{G}{\sqrt{m_k}}$ , which is at most  $\frac{LD\gamma_k}{2}$  with the choice of  $\gamma_k$  and  $m_k$ . So we arrive at  $\mathbb{E}[f(\mathbf{w}_k) - f(\mathbf{w}^*)] \leq (1 - \gamma_k)\mathbb{E}[f(\mathbf{w}_{k-1}) - f(\mathbf{w}^*)] + LD^2\gamma_k^2$ . It remains to use a simple induction to conclude the proof.  $\square$

Now it is clear that to achieve  $1 - \epsilon$  accuracy, SFW needs  $\mathcal{O}(\frac{LD^2}{\epsilon})$  iterations, and in total  $\mathcal{O}(\frac{G^2}{L^2D^2}(\frac{LD^2}{\epsilon})^3) = \mathcal{O}(\frac{G^2LD^4}{\epsilon^3})$  stochastic gradients.

### C. Proof of Lemma 3

*Proof.* Let  $\delta_s = \tilde{\nabla}_s - \nabla f(\mathbf{z}_s)$ . For any  $s \leq k$ , we proceed as follows:

$$\begin{aligned}
 f(\mathbf{y}_s) &\leq f(\mathbf{z}_s) + \nabla f(\mathbf{z}_s)^\top (\mathbf{y}_s - \mathbf{z}_s) + \frac{L}{2} \|\mathbf{y}_s - \mathbf{z}_s\|^2 && \text{(by smoothness)} \\
 &= (1 - \gamma_s)(f(\mathbf{z}_s) + \nabla f(\mathbf{z}_s)^\top (\mathbf{y}_{s-1} - \mathbf{z}_s)) + \gamma_s(f(\mathbf{z}_s) + \nabla f(\mathbf{z}_s)^\top (\mathbf{w}^* - \mathbf{z}_s)) + \gamma_s \nabla f(\mathbf{z}_s)^\top (\mathbf{x}_s - \mathbf{w}^*) \\
 &\quad + \frac{L\gamma_s^2}{2} \|\mathbf{x}_s - \mathbf{x}_{s-1}\|^2 && \text{(by definition of } \mathbf{y}_s \text{ and } \mathbf{z}_s) \\
 &\leq (1 - \gamma_s)f(\mathbf{y}_{s-1}) + \gamma_s f(\mathbf{w}^*) + \gamma_s \nabla f(\mathbf{z}_s)^\top (\mathbf{x}_s - \mathbf{w}^*) + \frac{L\gamma_s^2}{2} \|\mathbf{x}_s - \mathbf{x}_{s-1}\|^2 && \text{(by convexity)} \\
 &= (1 - \gamma_s)f(\mathbf{y}_{s-1}) + \gamma_s f(\mathbf{w}^*) + \gamma_s \tilde{\nabla}_s^\top (\mathbf{x}_s - \mathbf{w}^*) + \frac{L\gamma_s^2}{2} \|\mathbf{x}_s - \mathbf{x}_{s-1}\|^2 + \gamma_s \delta_s^\top (\mathbf{w}^* - \mathbf{x}_s) \\
 &\leq (1 - \gamma_s)f(\mathbf{y}_{s-1}) + \gamma_s f(\mathbf{w}^*) + \gamma_s \eta_{t,s} - \gamma_s \beta_s (\mathbf{x}_s - \mathbf{x}_{s-1})^\top (\mathbf{x}_s - \mathbf{w}^*) + \frac{L\gamma_s^2}{2} \|\mathbf{x}_s - \mathbf{x}_{s-1}\|^2 + \gamma_s \delta_s^\top (\mathbf{w}^* - \mathbf{x}_s) \\
 &\hspace{15em} \text{(by Eq. (4))} \\
 &= (1 - \gamma_s)f(\mathbf{y}_{s-1}) + \gamma_s f(\mathbf{w}^*) + \gamma_s \eta_{t,s} + \frac{\beta_s \gamma_s}{2} (\|\mathbf{x}_{s-1} - \mathbf{w}^*\|^2 - \|\mathbf{x}_s - \mathbf{w}^*\|^2) + \\
 &\quad \frac{\gamma_s}{2} \left( (L\gamma_s - \beta_s) \|\mathbf{x}_s - \mathbf{x}_{s-1}\|^2 + 2\delta_s^\top (\mathbf{x}_{s-1} - \mathbf{x}_s) + 2\delta_s^\top (\mathbf{w}^* - \mathbf{x}_{s-1}) \right) \\
 &\leq (1 - \gamma_s)f(\mathbf{y}_{s-1}) + \gamma_s f(\mathbf{w}^*) + \gamma_s \eta_{t,s} + \frac{\beta_s \gamma_s}{2} (\|\mathbf{x}_{s-1} - \mathbf{w}^*\|^2 - \|\mathbf{x}_s - \mathbf{w}^*\|^2) + \frac{\gamma_s}{2} \left( \frac{\|\delta_s\|^2}{\beta_s - L\gamma_s} + 2\delta_s^\top (\mathbf{w}^* - \mathbf{x}_{s-1}) \right),
 \end{aligned}$$

where the last inequality is by the fact  $\beta_s \geq L\gamma_s$  and thus

$$(L\gamma_s - \beta_s) \|\mathbf{x}_s - \mathbf{x}_{s-1}\|^2 + 2\delta_s^\top (\mathbf{x}_{s-1} - \mathbf{x}_s) = \frac{\|\delta_s\|^2}{\beta_s - L\gamma_s} - (\beta_s - L\gamma_s) \left\| \mathbf{x}_s - \mathbf{x}_{s-1} - \frac{\delta_s}{\beta_s - L\gamma_s} \right\|^2 \leq \frac{\|\delta_s\|^2}{\beta_s - L\gamma_s}.$$

Note that  $\mathbb{E}[\delta_s^\top (\mathbf{w}^* - \mathbf{x}_{s-1})] = \mathbf{0}$ . So with the condition  $\mathbb{E}[\|\delta_s\|^2] \leq \frac{L^2 D_t^2}{N_t(s+1)^2} \stackrel{\text{def}}{=} \sigma_s^2$  we arrive at

$$\mathbb{E}[f(\mathbf{y}_s) - f(\mathbf{w}^*)] \leq (1 - \gamma_s) \mathbb{E}[f(\mathbf{y}_{s-1}) - f(\mathbf{w}^*)] + \gamma_s \left( \eta_{t,s} + \frac{\beta_s}{2} (\mathbb{E}[\|\mathbf{x}_{s-1} - \mathbf{w}^*\|^2] - \mathbb{E}[\|\mathbf{x}_s - \mathbf{w}^*\|^2]) + \frac{\sigma_s^2}{2(\beta_s - L\gamma_s)} \right).$$

Now define  $\Gamma_s = \Gamma_{s-1}(1 - \gamma_s)$  when  $s > 1$  and  $\Gamma_1 = 1$ . By induction, one can verify  $\Gamma_s = \frac{2}{s(s+1)}$  and the following:

$$\mathbb{E}[f(\mathbf{y}_k) - f(\mathbf{w}^*)] \leq \Gamma_k \sum_{s=1}^k \frac{\gamma_s}{\Gamma_s} \left( \eta_{t,s} + \frac{\beta_s}{2} (\mathbb{E}[\|\mathbf{x}_{s-1} - \mathbf{w}^*\|^2] - \mathbb{E}[\|\mathbf{x}_s - \mathbf{w}^*\|^2]) + \frac{\sigma_s^2}{2(\beta_s - L\gamma_s)} \right),$$

which is at most

$$\Gamma_k \sum_{s=1}^k \frac{\gamma_s}{\Gamma_s} \left( \eta_s + \frac{\sigma_s^2}{2(\beta_s - L\gamma_s)} \right) + \frac{\Gamma_k}{2} \left( \frac{\gamma_1 \beta_1}{\Gamma_1} \mathbb{E}[\|\mathbf{x}_0 - \mathbf{w}^*\|^2] + \sum_{s=2}^k \left( \frac{\gamma_s \beta_s}{\Gamma_s} - \frac{\gamma_{s-1} \beta_{s-1}}{\Gamma_{s-1}} \right) \mathbb{E}[\|\mathbf{x}_{s-1} - \mathbf{w}^*\|^2] \right).$$

Finally plugging in the parameters  $\gamma_s, \beta_s, \eta_{t,s}, \Gamma_s$  and the bound  $\mathbb{E}[\|\mathbf{x}_0 - \mathbf{w}^*\|^2] \leq D_t^2$  concludes the proof:

$$\mathbb{E}[f(\mathbf{y}_k) - f(\mathbf{w}^*)] \leq \frac{2}{k(k+1)} \sum_{s=1}^k k \left( \frac{2LD_t^2}{N_t k} + \frac{LD_t^2}{2N_t(k+1)} \right) + \frac{3LD_t^2}{k(k+1)} \leq \frac{8LD_t^2}{k(k+1)}.$$

□
